# Supplementary material for: Bind&Bite: covalently stabilized heterodimeric coiled-coil peptides for the site-selective, cysteine-free chemical modification of proteins
Source: PubMed Central journal article supplement — RSC Chem Biol. 2023 Aug 8;4(10):794–803. doi: 10.1039/d3cb00122a (PMC10549240; doi:10.1039/d3cb00122a), 2023-08-08
Supplement: CB-004-D3CB00122A-s001.pdf [file CB-004-D3CB00122A-s001.pdf]

Electronic Supplementary Information

**Bind&Bite: Covalently stabilized heterodimeric coiled-coil peptides for the stable, site-selective, cysteine-free chemical modification of proteins**

Jannis Beutel, Pierre Tannig, Riccardo Di Vincenzo, Thomas Schumacher, Klaus Überla and Jutta Eichler

Analytical data of peptides

| Peptide  | Sequence                                      | M(calc.) | [M+H] <sup>+</sup> | [M+2H] <sup>2+</sup> | [M+3H] <sup>3+</sup> |
|----------|-----------------------------------------------|----------|--------------------|----------------------|----------------------|
| Bio-PepK | Bio-Aoa-KIAALKEKIAALKEKIAALKE-NH <sub>2</sub> | 2650.3   | 2651.3             | 1326.2               | 884.4                |

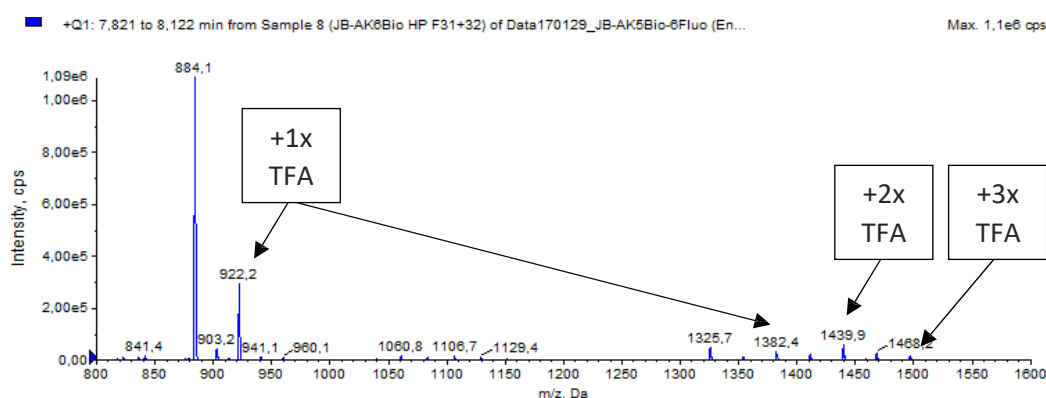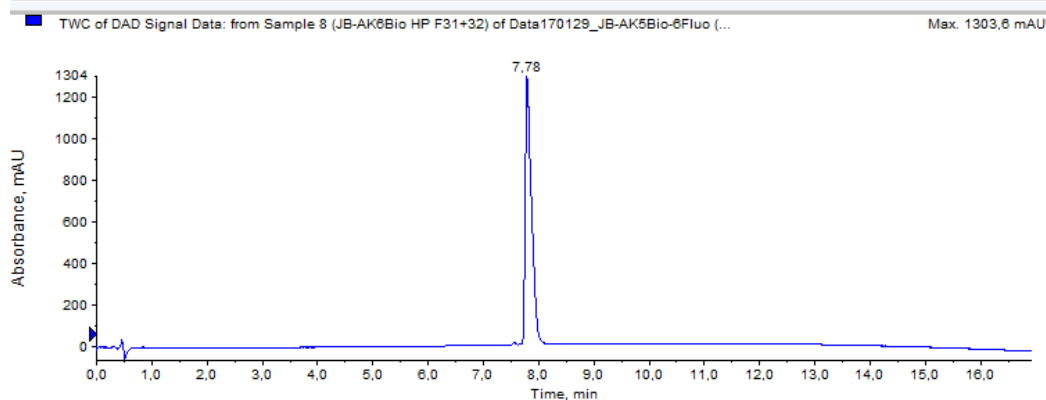

| Peptide  | Sequence                                      | M(calc.) | [M+H] <sup>+</sup> | [M+2H] <sup>2+</sup> | [M+3H] <sup>3+</sup> |
|----------|-----------------------------------------------|----------|--------------------|----------------------|----------------------|
| Bio-PepE | Bio-Aoa-EIAALEKEIAALEKEIAALEK-NH <sub>2</sub> | 2653.1   | 2654.1             | 1327.6               | 885.4                |

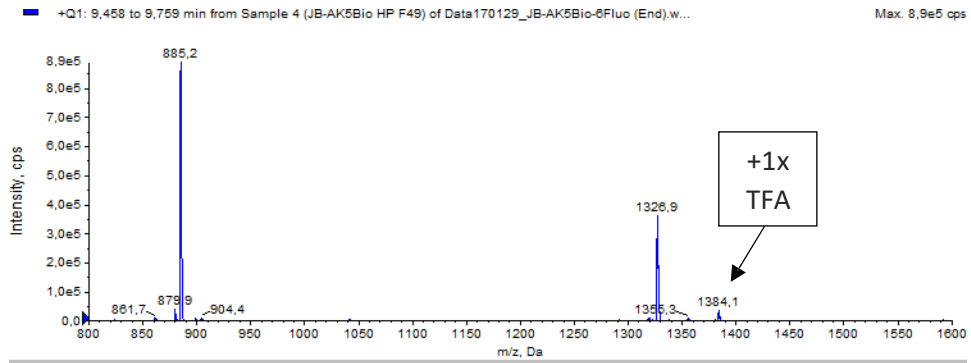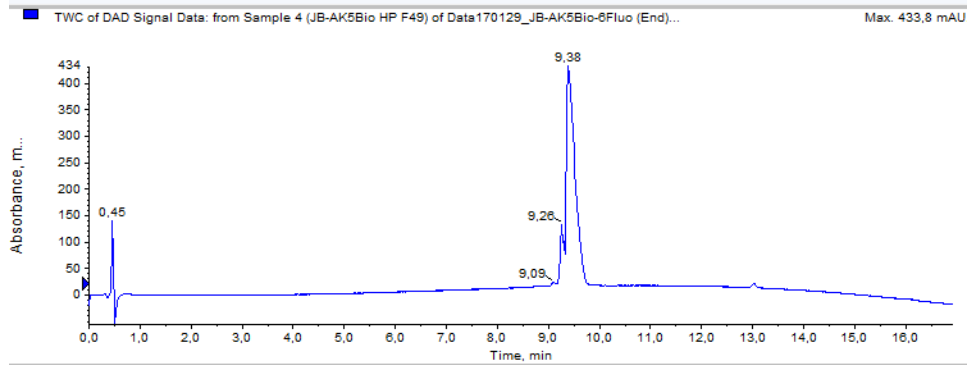

| Peptide   | Sequence                                       | M(calc.) | [M+H] <sup>+</sup> | [M+2H] <sup>2+</sup> | [M+3H] <sup>3+</sup> |
|-----------|------------------------------------------------|----------|--------------------|----------------------|----------------------|
| Fluo-PepE | Fluo-Aoa-EIAALEREIAALEREIAALER-NH <sub>2</sub> | 2869.2   | 2870.2             | 1435.6               | 957.4                |

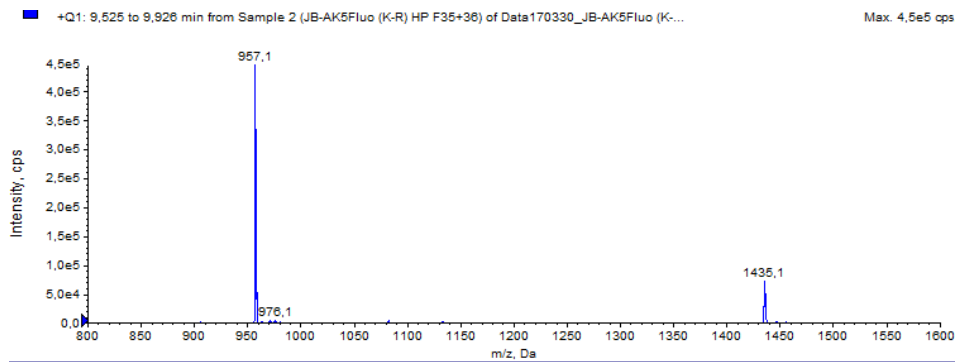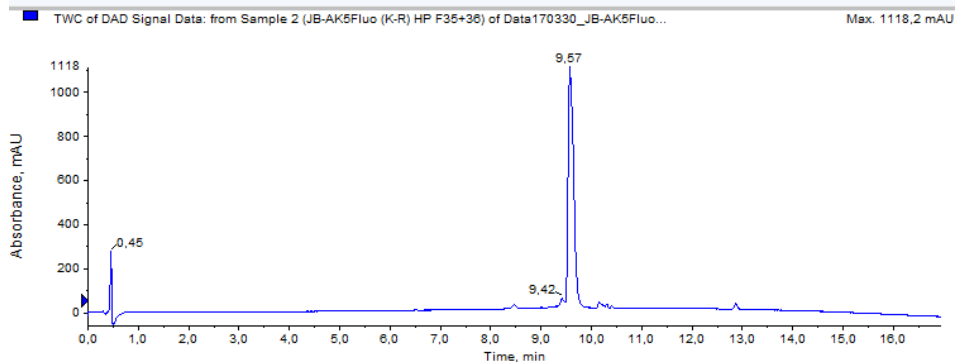

| Peptide   | Sequence                                       | M(calc.) | [M+H] <sup>+</sup> | [M+2H] <sup>2+</sup> | [M+3H] <sup>3+</sup> |
|-----------|------------------------------------------------|----------|--------------------|----------------------|----------------------|
| Fluo-PepK | Fluo-Aoa-RIAALRERIAALRERIAALRE-NH <sub>2</sub> | 2953.3   | 2954.3             | 1477.7               | 985.4                |

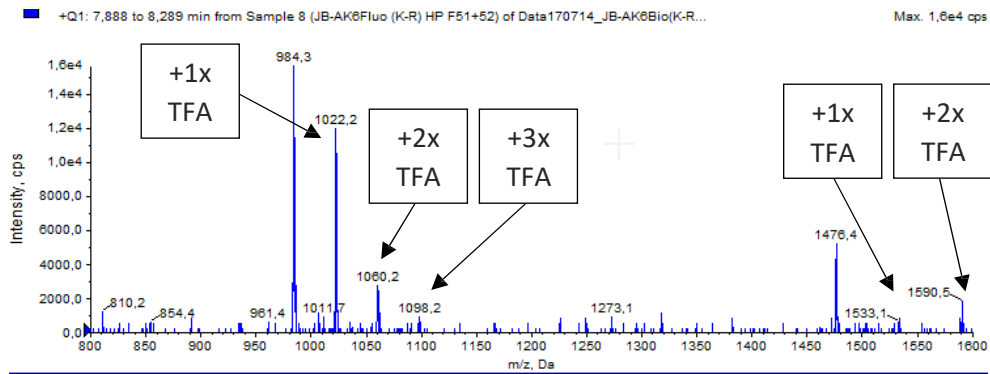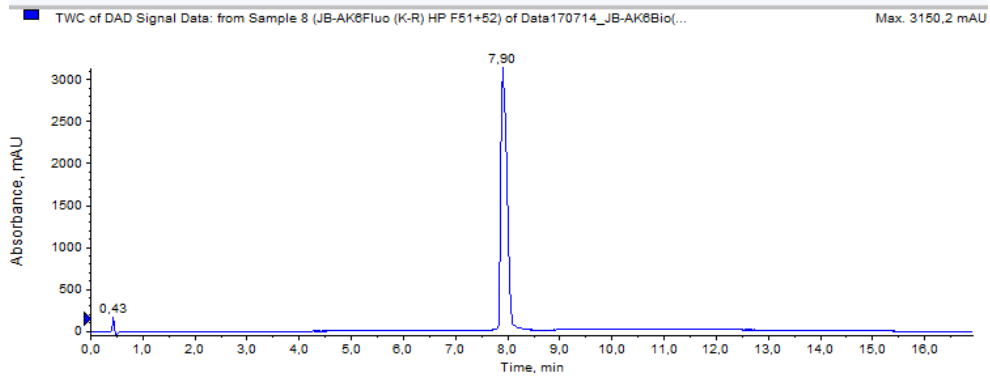

| Peptide  | Sequence                                           | M(calc.) | [M+H] <sup>+</sup> | [M+2H] <sup>2+</sup> | [M+3H] <sup>3+</sup> |
|----------|----------------------------------------------------|----------|--------------------|----------------------|----------------------|
| PepE-Bio | Ac-EIAALEREIAALER-Aoa-Aoa-Lys(Bio)-NH <sub>2</sub> | 3055.4   | 3056.4             | 1528.7               | 1019.5               |

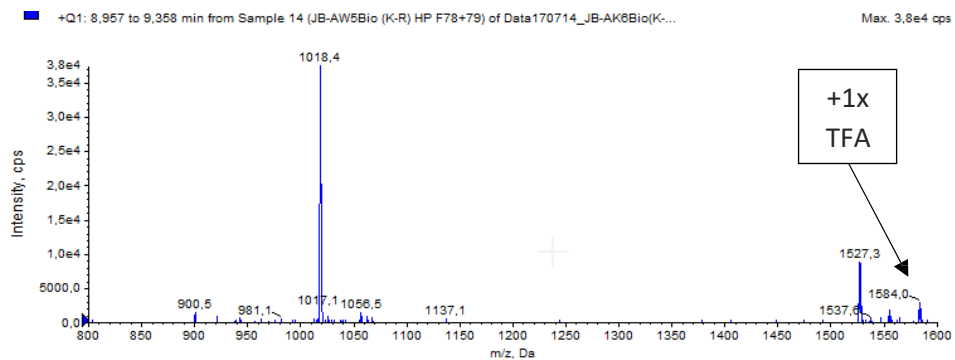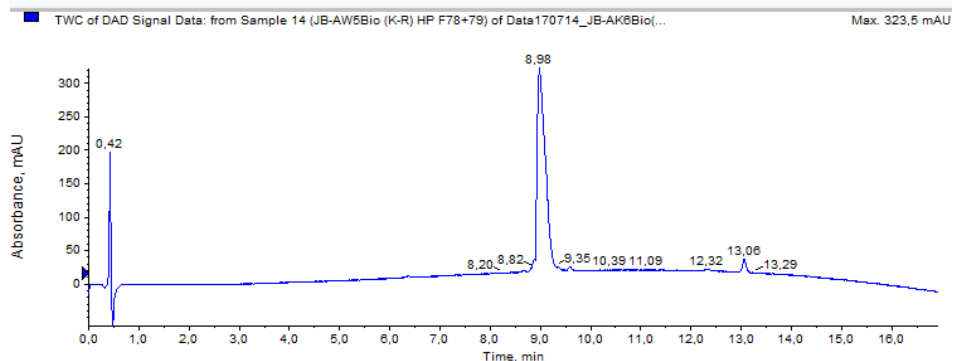

| Peptide   | Sequence                                      | M(calc.) | [M+H] <sup>+</sup> | [M+2H] <sup>2+</sup> | [M+3H] <sup>3+</sup> |
|-----------|-----------------------------------------------|----------|--------------------|----------------------|----------------------|
| PepK(K13) | Bio-Aoa-RIAALRERIAALKERIAALRE-NH <sub>2</sub> | 2791.3   | 2792.3             | 1396.7               | 931.4                |

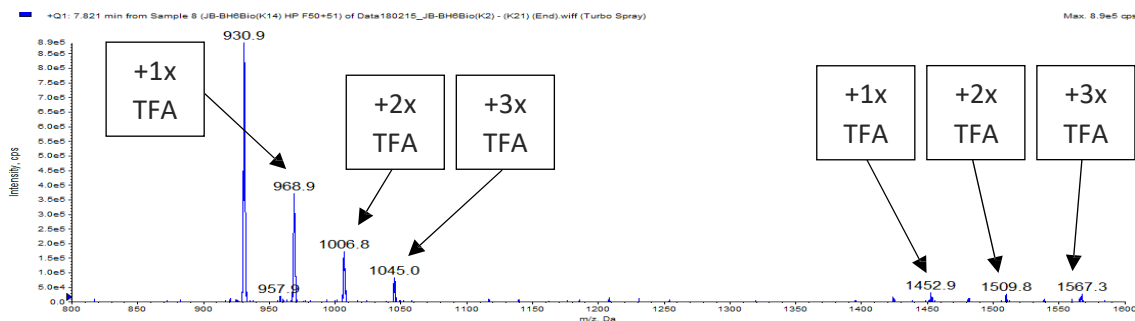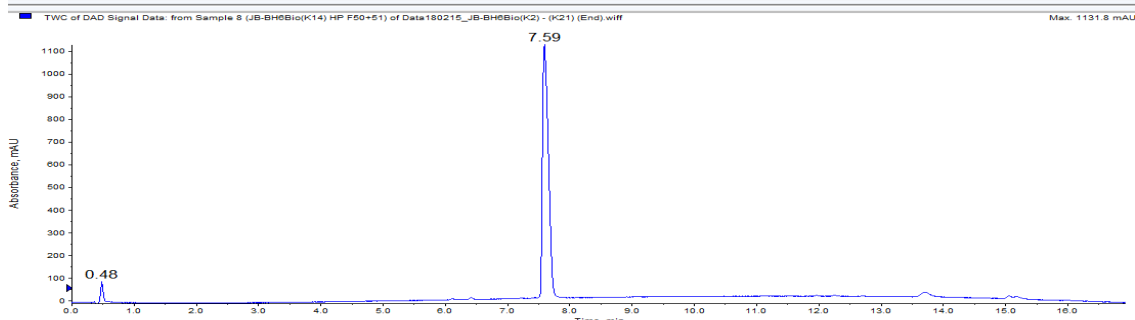

| Peptide  | Sequence                                      | M(calc.) | [M+H] <sup>+</sup> | [M+2H] <sup>2+</sup> | [M+3H] <sup>3+</sup> |
|----------|-----------------------------------------------|----------|--------------------|----------------------|----------------------|
| PepK(K6) | Bio-Aoa-RIAALKERIAALRERIAALRE-NH <sub>2</sub> | 2791.3   | 2792.3             | 1396.7               | 931.4                |

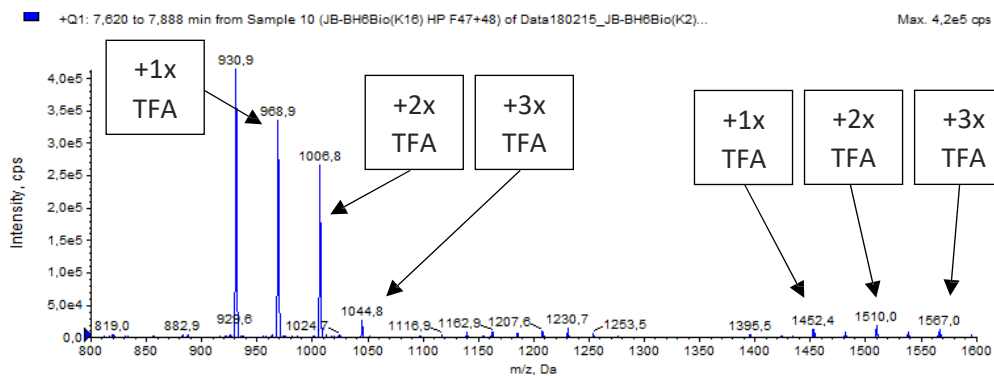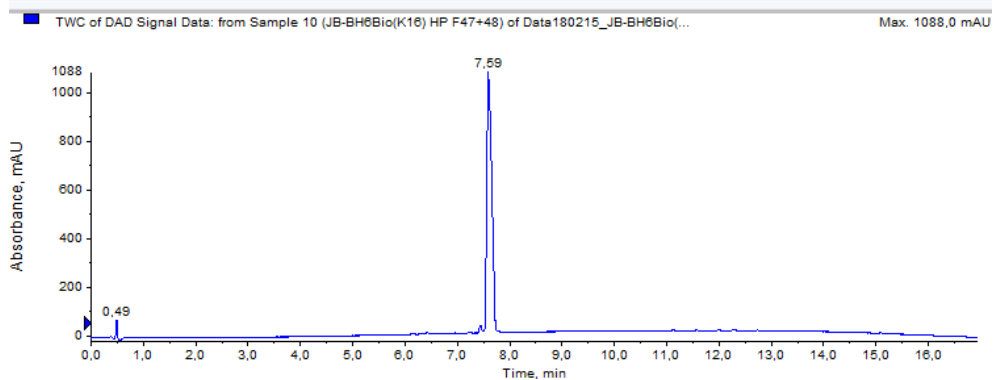

| Peptide   | Sequence                                      | M(calc.) | [M+H] <sup>+</sup> | [M+2H] <sup>2+</sup> | [M+3H] <sup>3+</sup> |
|-----------|-----------------------------------------------|----------|--------------------|----------------------|----------------------|
| PepE(-1C) | Fluo-Aoa-EIAALEREIAALEREIAALE-NH <sub>2</sub> | 2712.8   | 2713.8             | 1357.4               | 905.3                |

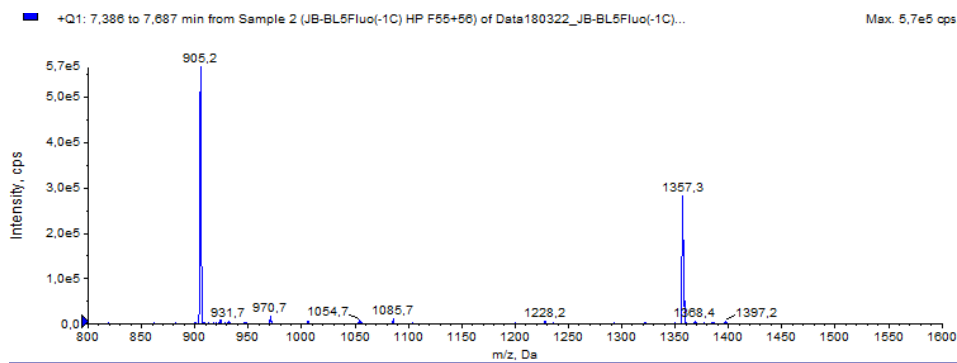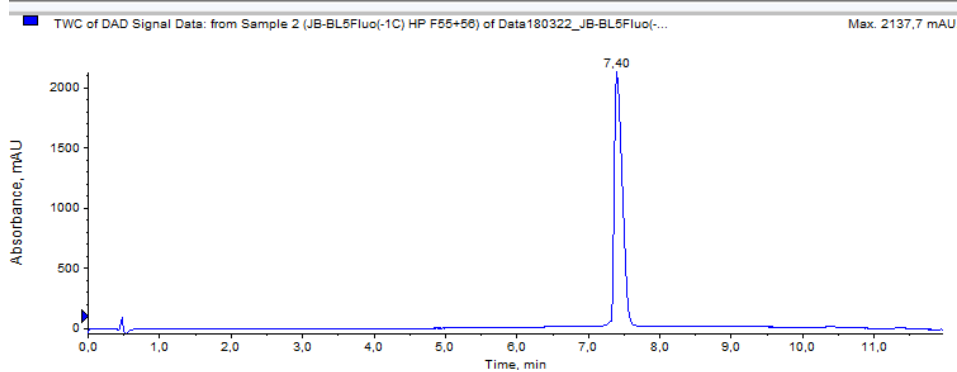

| Peptide   | Sequence                                     | M(calc.) | [M+H] <sup>+</sup> | [M+2H] <sup>2+</sup> | [M+3H] <sup>3+</sup> |
|-----------|----------------------------------------------|----------|--------------------|----------------------|----------------------|
| PepE(-2C) | Fluo-Aoa-EIAALEREIAALEREIAAL-NH <sub>2</sub> | 2583.7   | 2584.7             | 1292.9               | 862.2                |

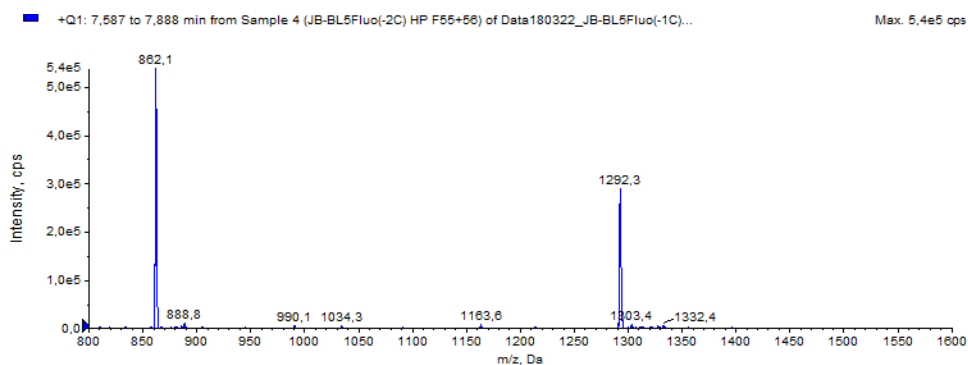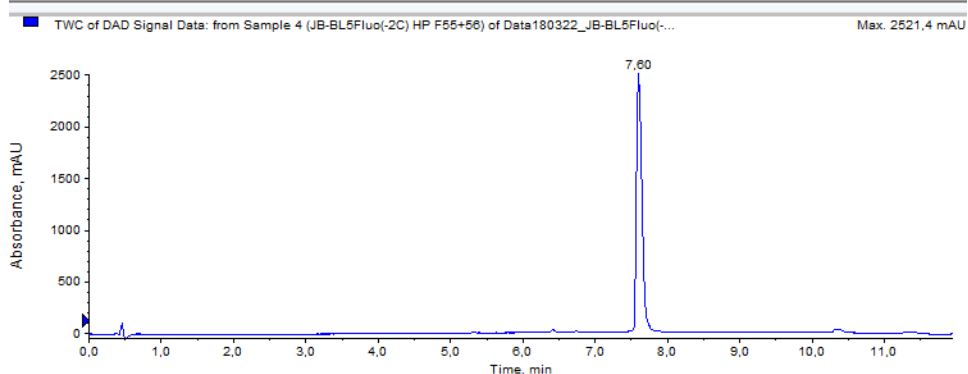

| Peptide   | Sequence                                    | M(calc.) | [M+H] <sup>+</sup> | [M+2H] <sup>2+</sup> | [M+3H] <sup>3+</sup> |
|-----------|---------------------------------------------|----------|--------------------|----------------------|----------------------|
| PepE(-3C) | Fluo-Aoa-EIAALEREIAALEREIAA-NH <sub>2</sub> | 2470.5   | 2471.5             | 1236.3               | 824.5                |

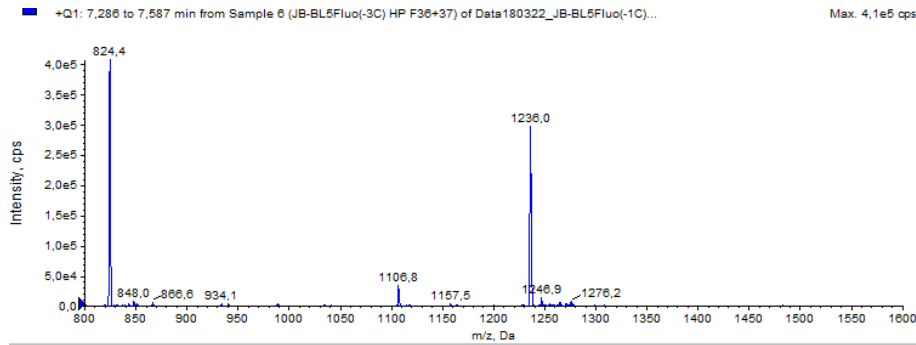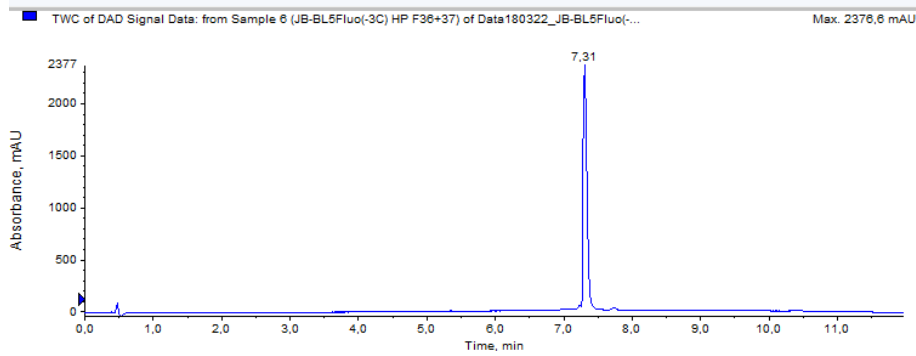

| Peptide   | Sequence                                   | M(calc.) | [M+H] <sup>+</sup> | [M+2H] <sup>2+</sup> | [M+3H] <sup>3+</sup> |
|-----------|--------------------------------------------|----------|--------------------|----------------------|----------------------|
| PepE(-4C) | Fluo-Aoa-EIAALEREIAALEREIA-NH <sub>2</sub> | 2399.5   | 2400.5             | 1200.8               | 800.8                |

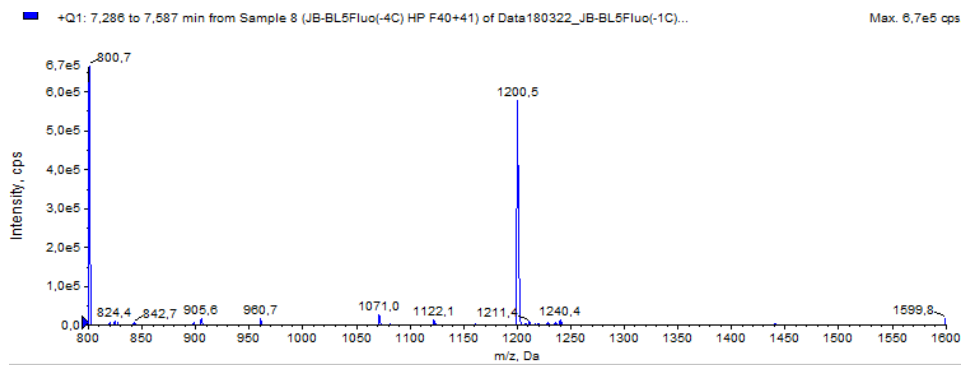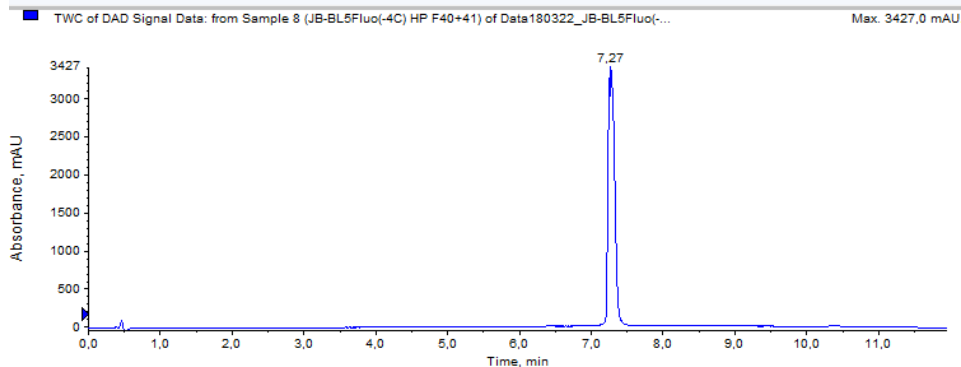

| Peptide   | Sequence                                  | M(calc.) | [M+H] <sup>+</sup> | [M+2H] <sup>2+</sup> | [M+3H] <sup>3+</sup> |
|-----------|-------------------------------------------|----------|--------------------|----------------------|----------------------|
| PepE(-5C) | Fluo-Aoa-EIAALEREIAALEREI-NH <sub>2</sub> | 2328.4   | 2329.4             | 1165.2               | 777.1                |

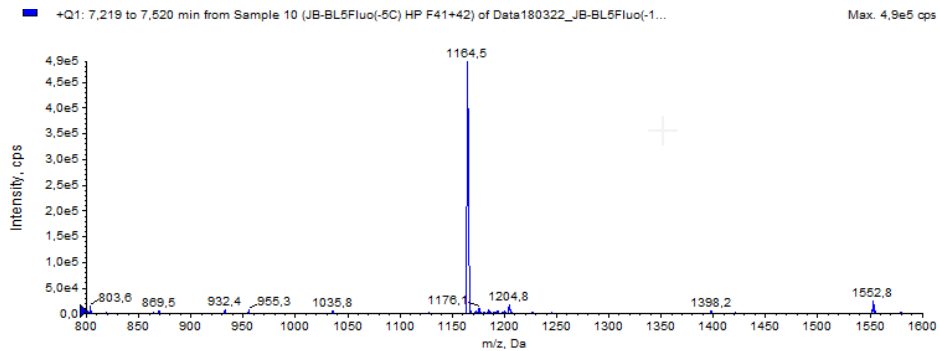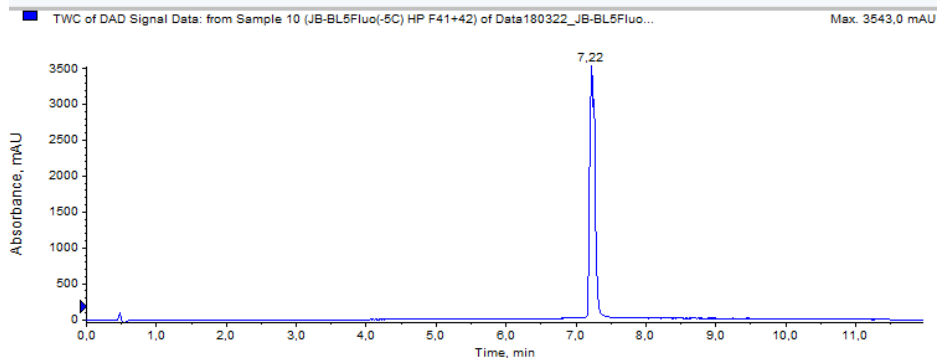

| Peptide   | Sequence                                  | M(calc.) | [M+H] <sup>+</sup> | [M+2H] <sup>2+</sup> | [M+3H] <sup>3+</sup> |
|-----------|-------------------------------------------|----------|--------------------|----------------------|----------------------|
| PepE(-6C) | Fluo-Aoa-EIAALEREIAALEREI-NH <sub>2</sub> | 2215.2   | 2216.2             | 1108.6               | 739.4                |

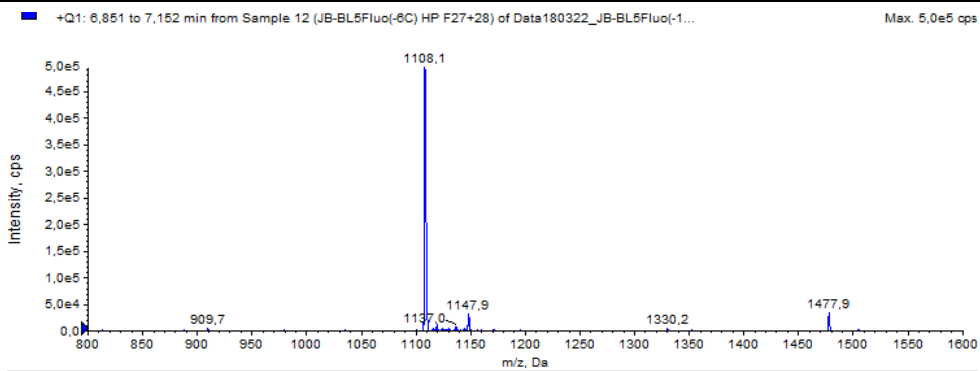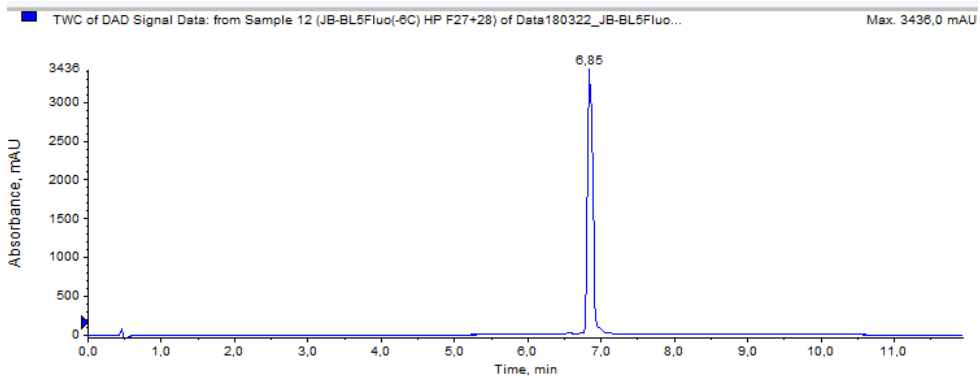

| Peptide   | Sequence                                | M(calc.) | [M+H] <sup>+</sup> | [M+2H] <sup>2+</sup> | [M+3H] <sup>3+</sup> |
|-----------|-----------------------------------------|----------|--------------------|----------------------|----------------------|
| PepE(-7C) | Fluo-Aoa-EIAALEREIAALER-NH <sub>2</sub> | 2086.1   | 2087.1             | 1044.1               | 696.4                |

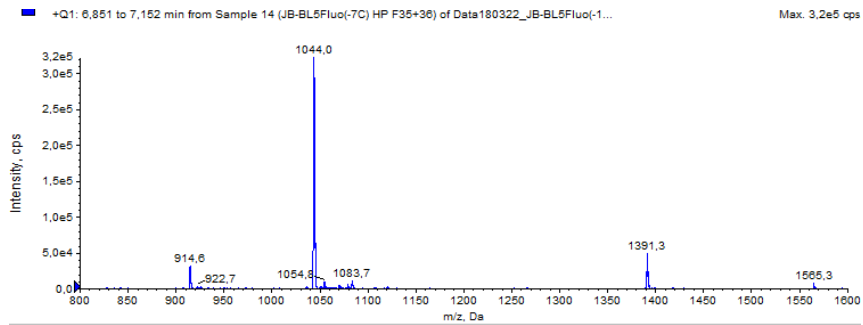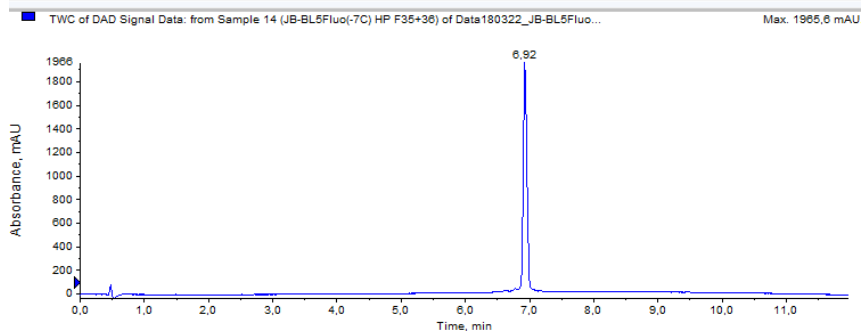

| Peptide    | Sequence                                                     | M(calc.) | [M+H] <sup>+</sup> | [M+2H] <sup>2+</sup> | [M+3H] <sup>3+</sup> |
|------------|--------------------------------------------------------------|----------|--------------------|----------------------|----------------------|
| PepE(ARS8) | NBD-Sarc-Aoa-EIAALER-Dap(EDCB)-IAALEREIAALER-NH <sub>2</sub> | 2825.1   | 2826.1             | 1413.5               | 942.7                |

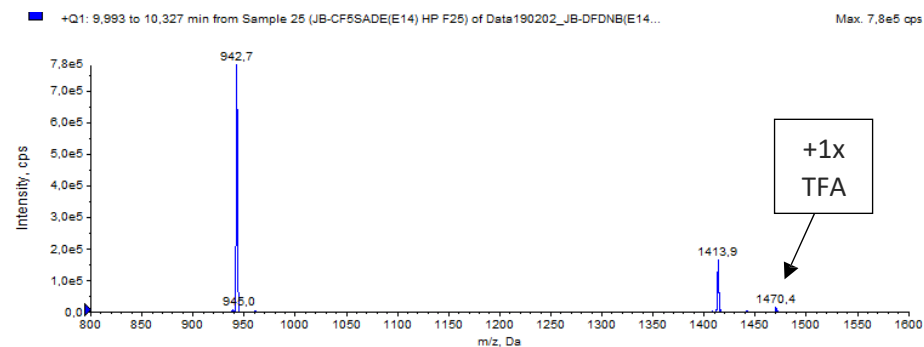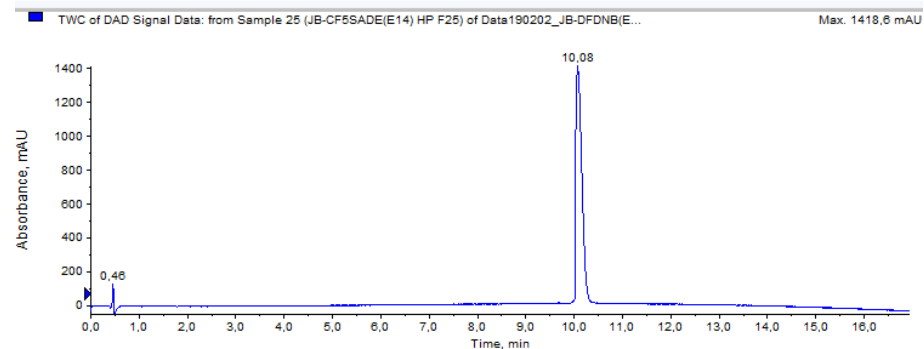



| Peptide     | Sequence                                                    | M(calc.) | [M+H] <sup>+</sup> | [M+2H] <sup>2+</sup> | [M+3H] <sup>3+</sup> |
|-------------|-------------------------------------------------------------|----------|--------------------|----------------------|----------------------|
| PepE(ARS15) | NBD-Sarc-Aoa-EIAALERIAALER-Dap(EDCB)-IAALER-NH <sub>2</sub> | 2825.1   | 2826.1             | 1413.5               | 942.7                |

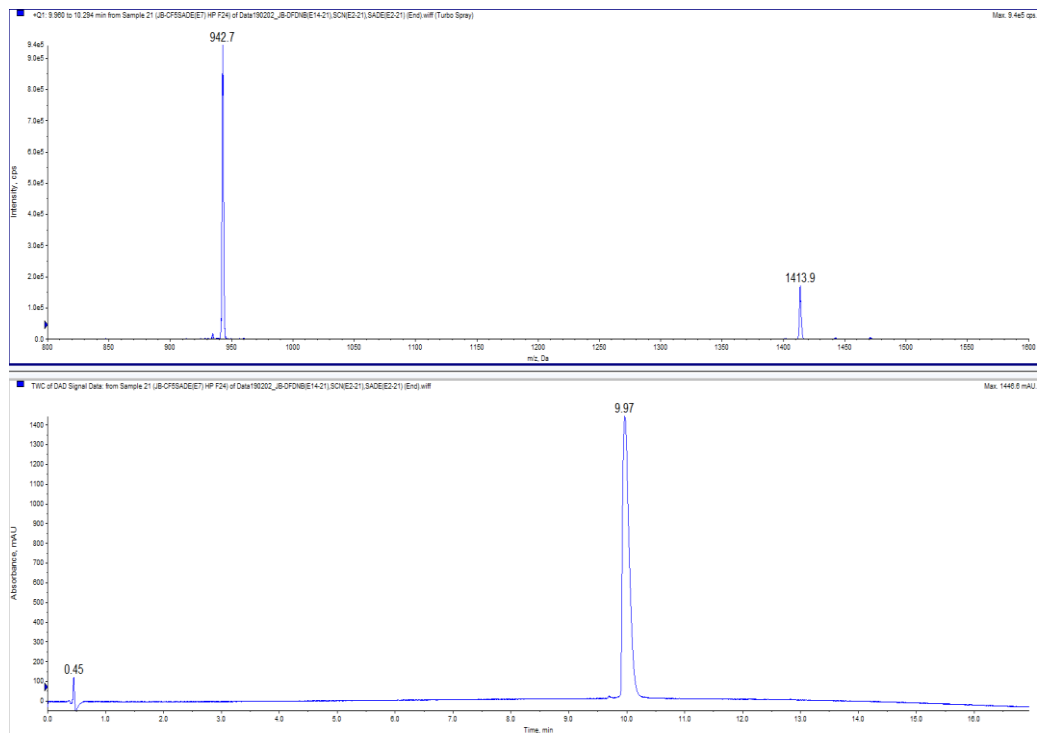

**Figure S1.** LC-MS data of peptides. Tables: ESI mass spectrometry data. Graphs: top: mass spectra, bottom: UV chromatograms (combined absorption at 220 and 280 nm). Masses of single, double and triple TFA adducts, which have been reported for arginine-rich peptides (<https://www.ncbi.nlm.nih.gov/pmc/articles/PMC3397831/>), are marked accordingly.

# match 1: PepK(K6)+PepE(ARS8)

Chromatogram:

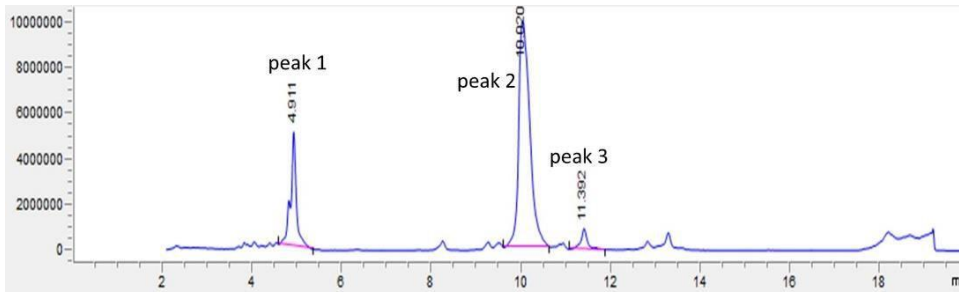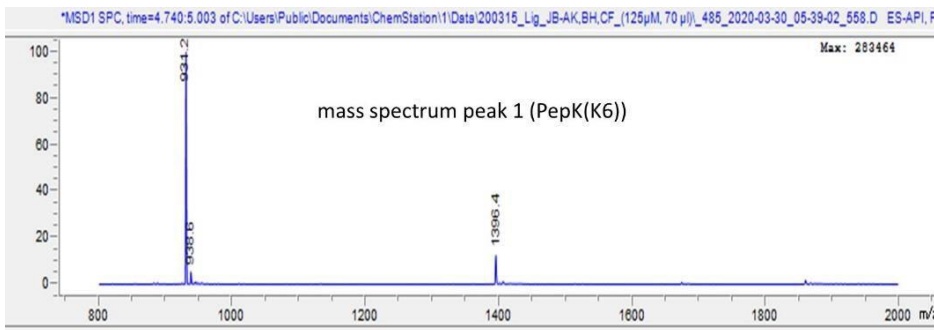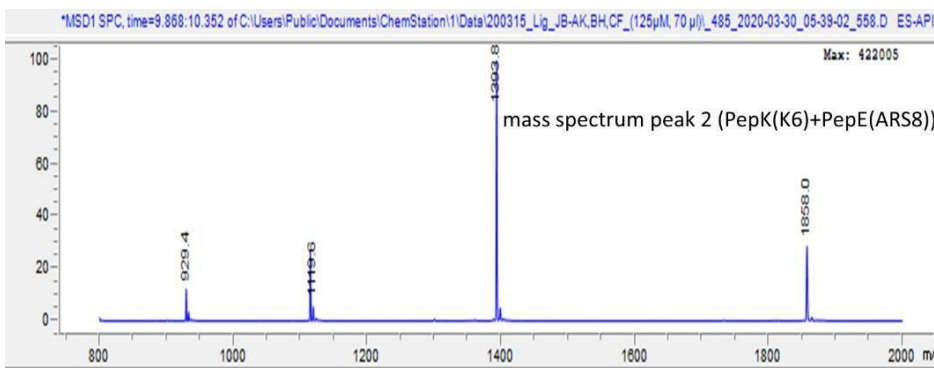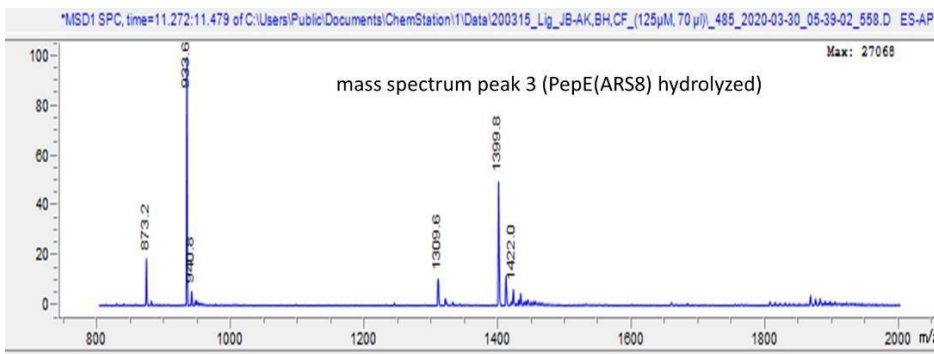

# mismatch 1: + PepK(K13)+PepE(ARS8)

Chromatogram:

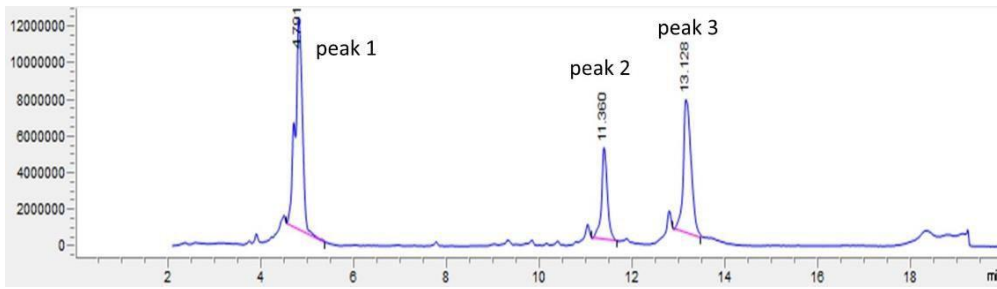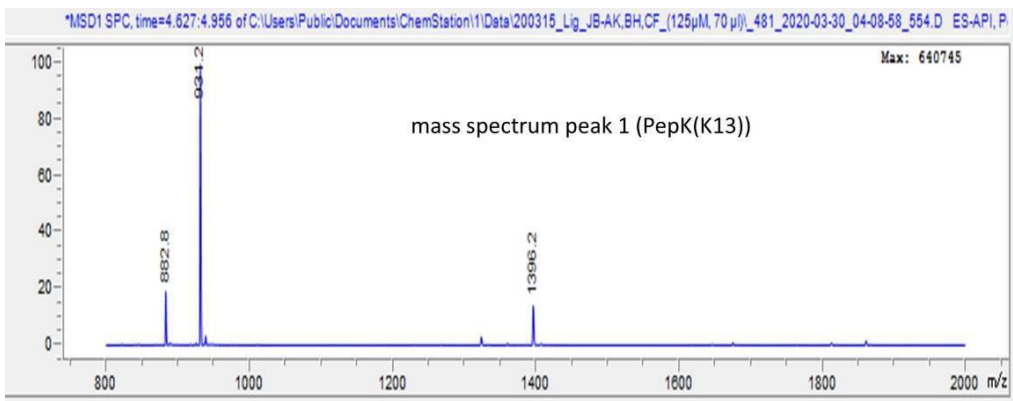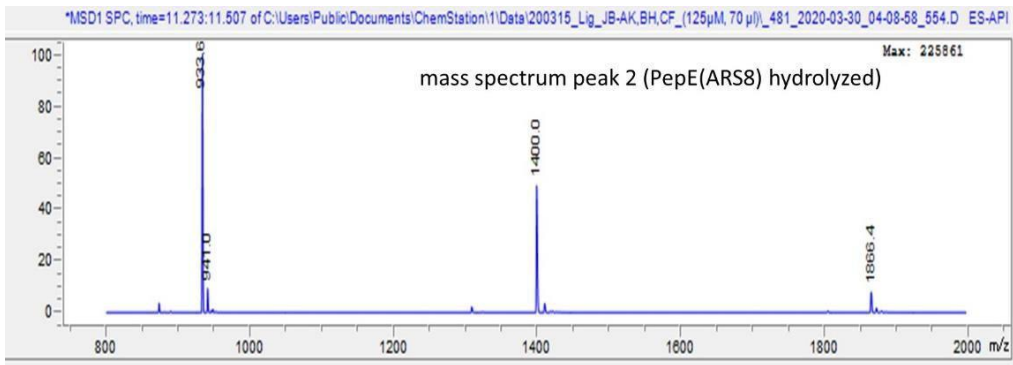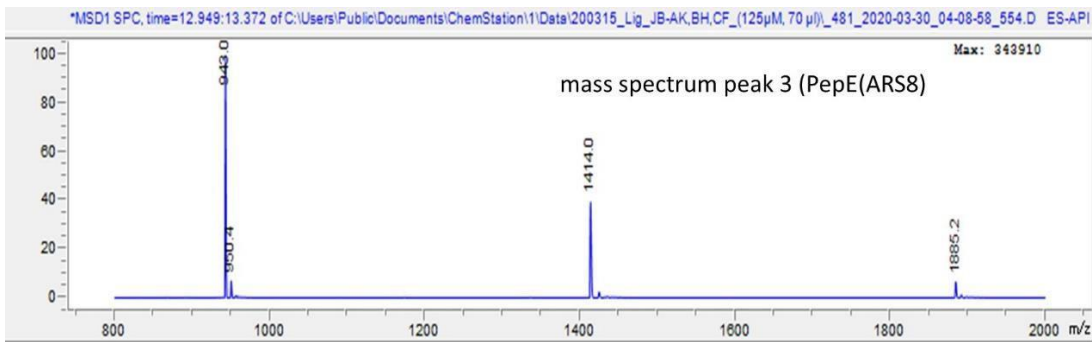

## match 2: PepK(K13)+PepE(ARS15)

Chromatogram:

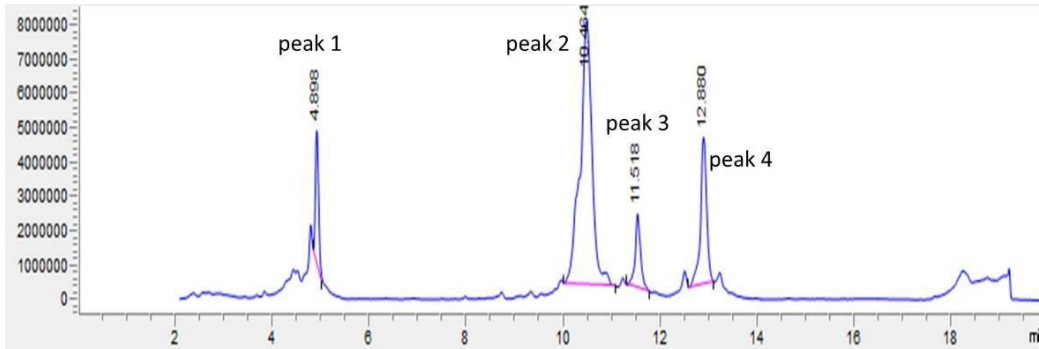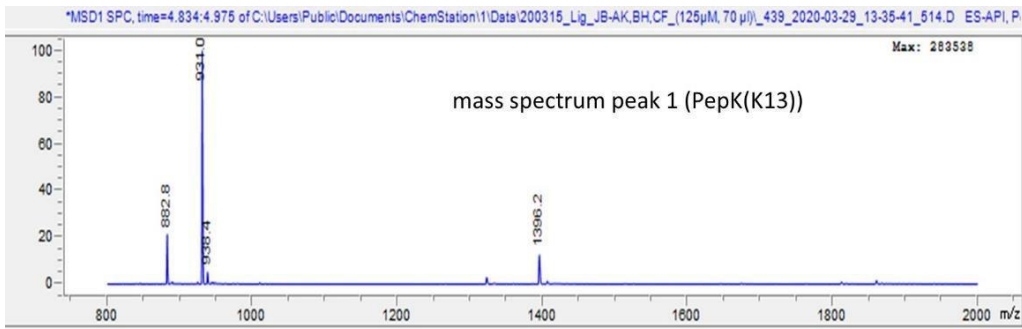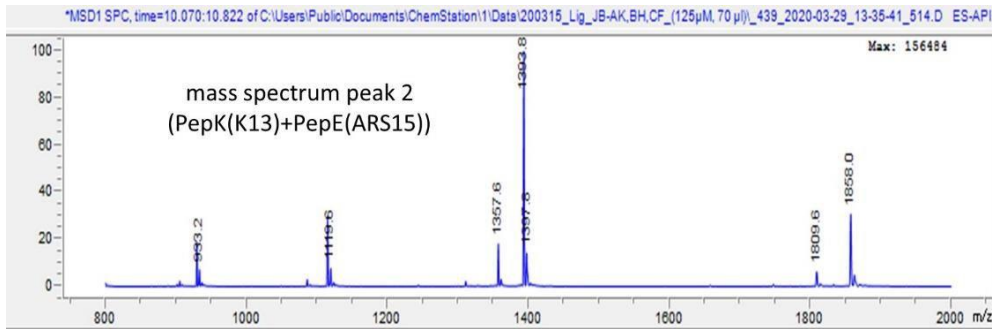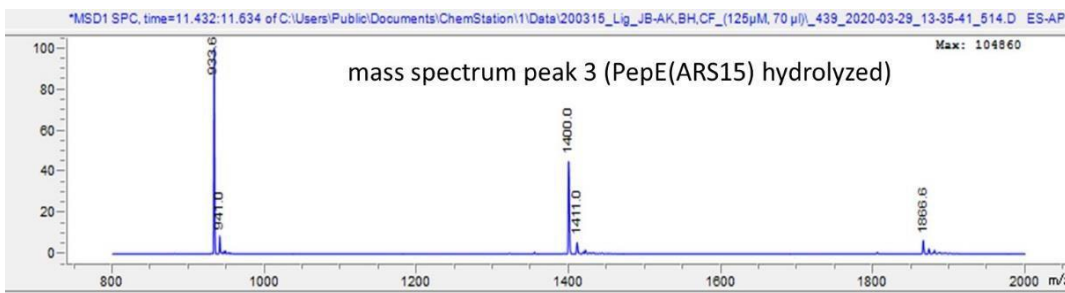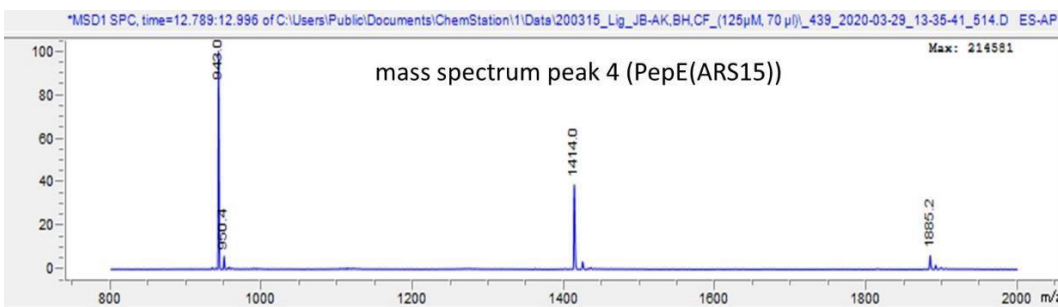

## mismatch 2: PepK(K6)+PepE(ARS15)

Chromatogram:

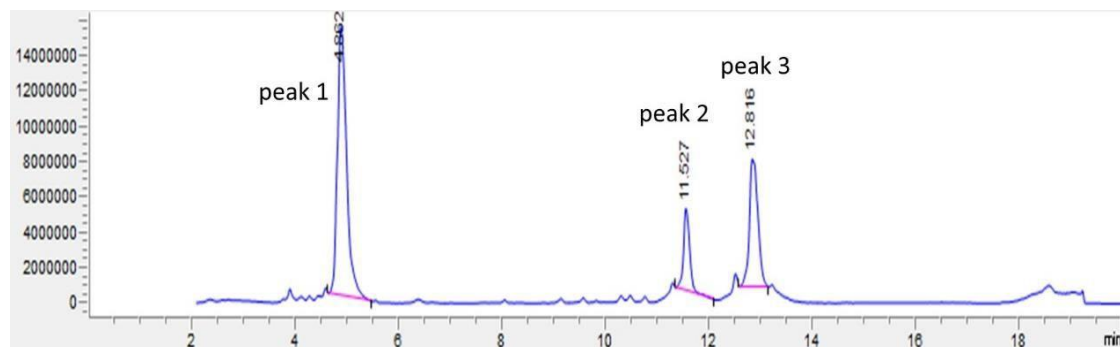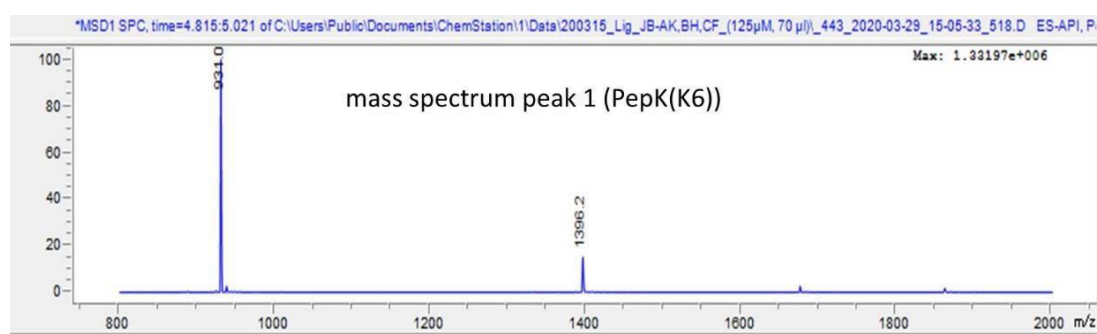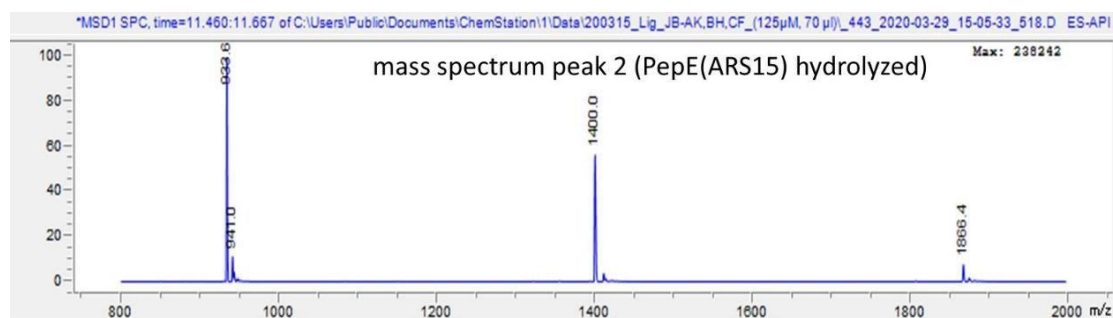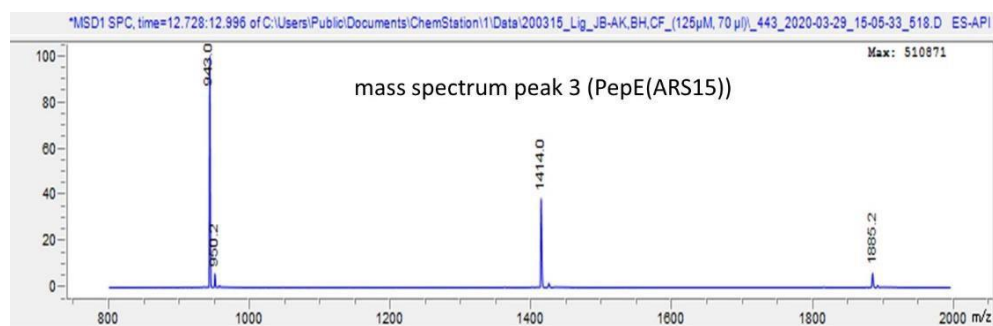

**Figure S2.** LC-MS data (TIC chromatograms and mass spectra of individual peaks of all match and mismatch reaction products of orthogonal pairs of coiled-coil peptides.

| Peptide                                              | Sequence                                                                                    | M(calc.) | [M+H] <sup>+</sup> | [M+2H] <sup>2+</sup> | [M+3H] <sup>3+</sup> | [M+4H] <sup>4+</sup> | [M+5H] <sup>5+</sup> |
|------------------------------------------------------|---------------------------------------------------------------------------------------------|----------|--------------------|----------------------|----------------------|----------------------|----------------------|
| PepE-Bio<br>+<br>Bio-PepK<br>(1 isopeptide<br>bond)  | Ac-EIAALEREIAALEREIAALER-Aoa-Aoa-<br>Lys(Bio)-NH2<br>+<br>Bio-Aoa-KIAALKEKIAALKEKIAALKE-NH2 | 5685.2   |                    | 1895.7               | 1422.1               | 1137.8               | 948.4                |
| PepE-Bio<br>+<br>Bio-PepK<br>(2 isopeptide<br>bonds) | Ac-EIAALEREIAALEREIAALER-Aoa-Aoa-<br>Lys(Bio)-NH2<br>+<br>Bio-Aoa-KIAALKEKIAALKEKIAALKE-NH2 | 5667.2   |                    | 1889.7               | 1417.6               | 1134.2               | 945.4                |

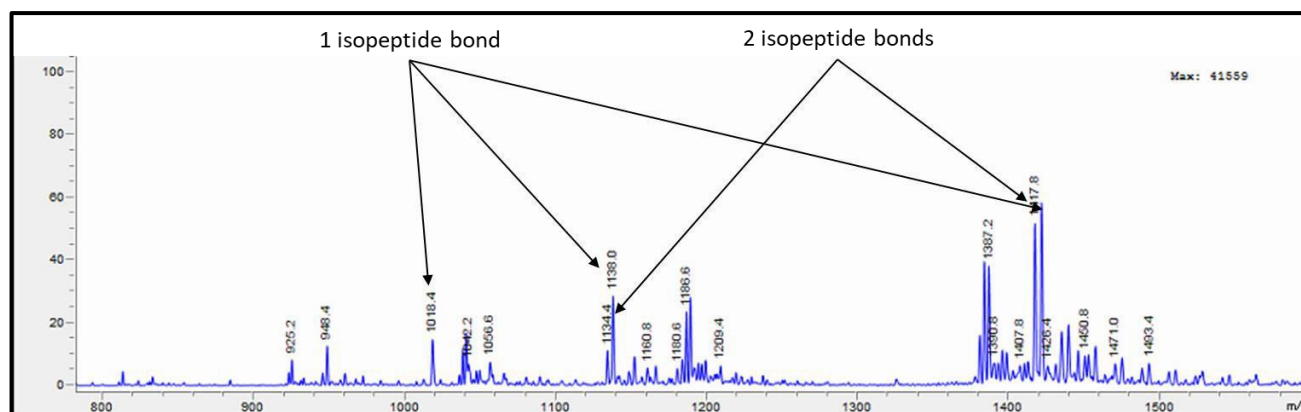

**Figure S3.** Mass spectrum of the product of the reaction of pre-activated PepE-Bio with Bio-PepK.
